# Supplementary material
Source: publisher figshare collection journal article supplement (https://sage.figshare.com/ndownloader/files/30771790)
Supplement: Supplementary file 1 [file 30771790]

FIGURE 1


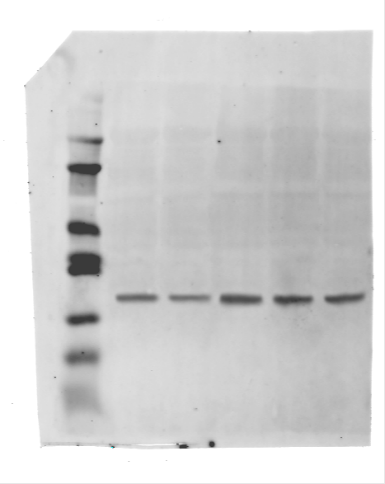

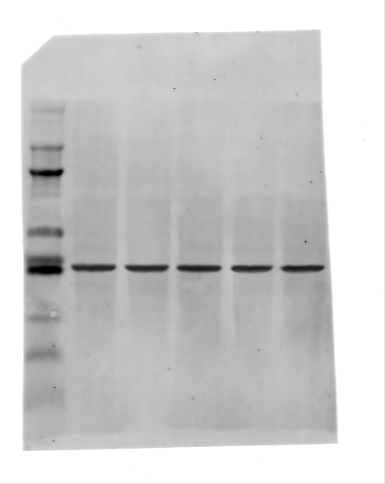


Fig1-a-ING5 Fig1-a-actin




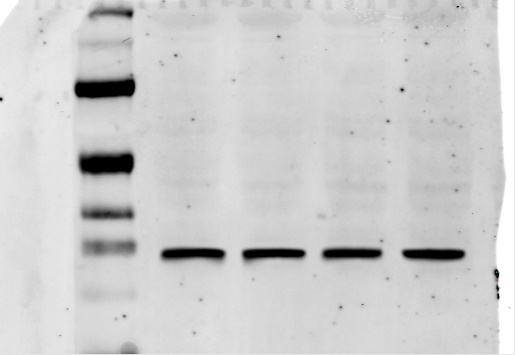


Fig-c-EC-109-ING5 Fig-c-EC-109-actin1







Fig-c-TE-1-ING5 Fig-c-TE-1-actin

FIGURE2

proliferation


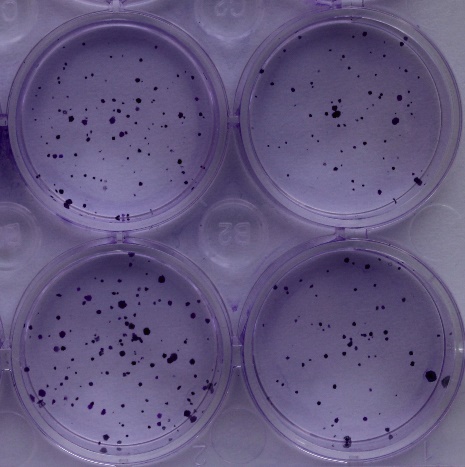

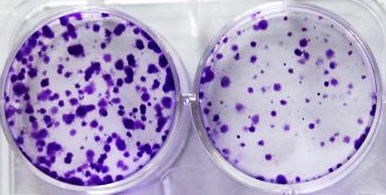


EC-109 TE-1

Invasion


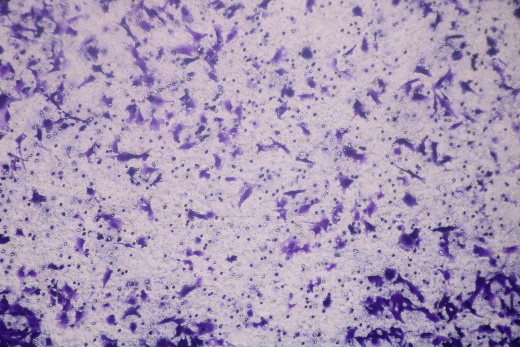

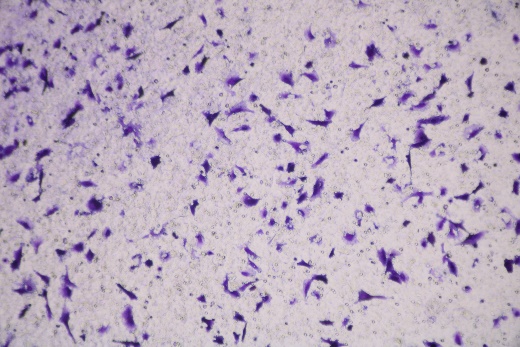


EC-109


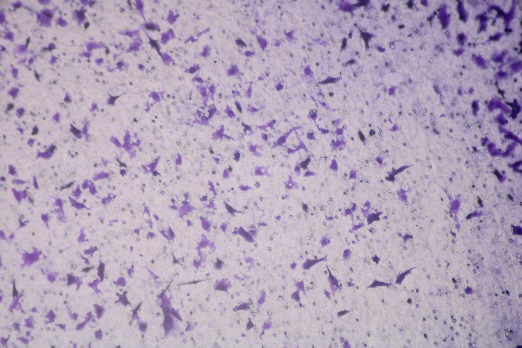

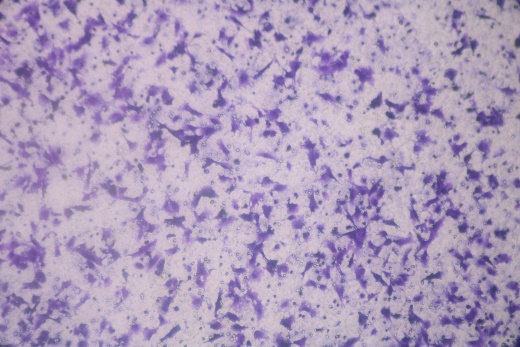


TE-1

Migration


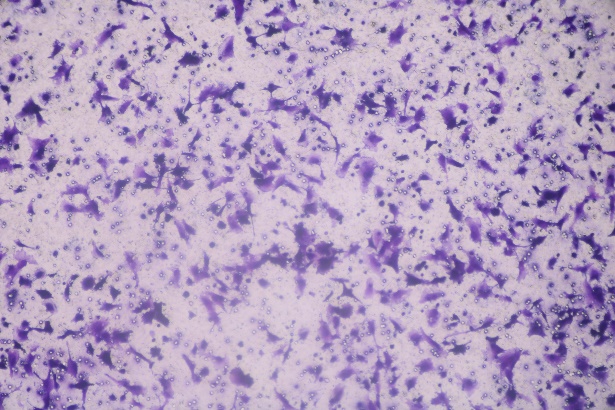

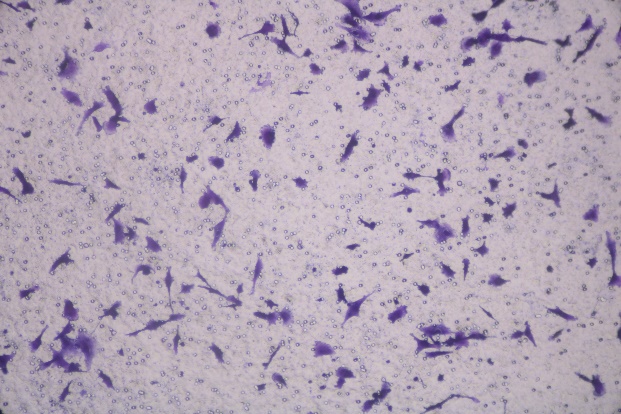


EC-109


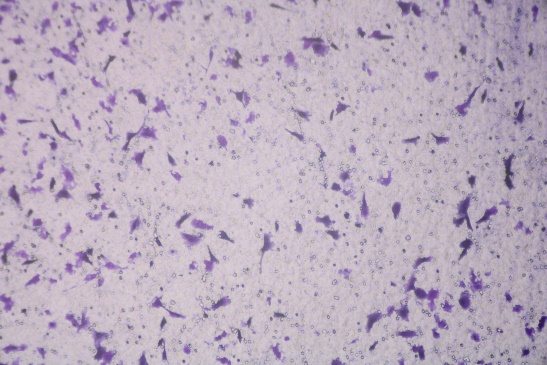

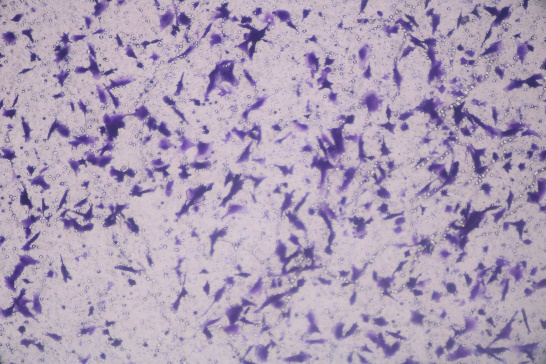


TE-1

healing assays


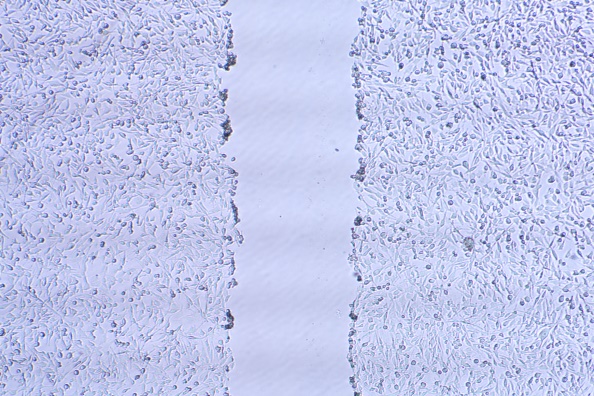

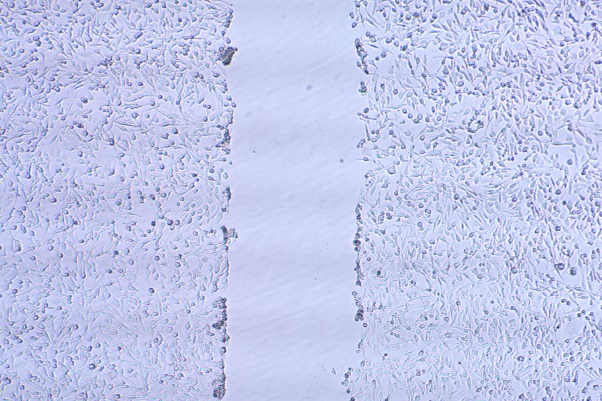


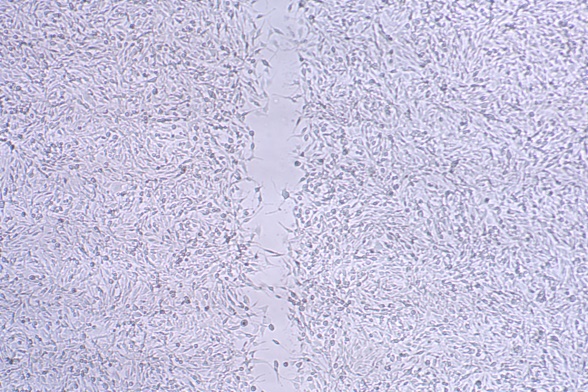

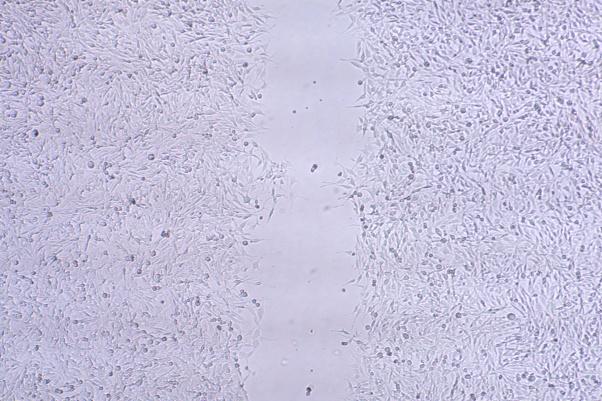


EC-109


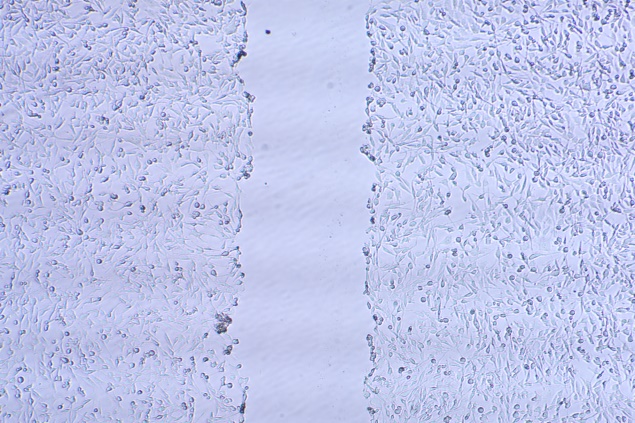

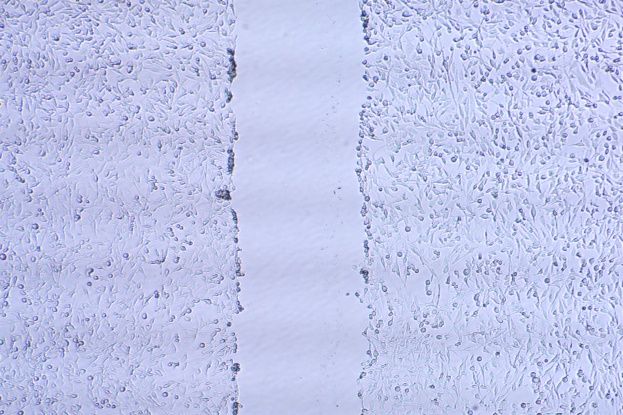


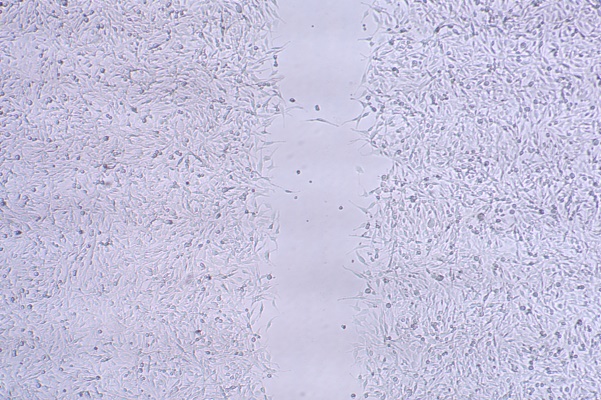

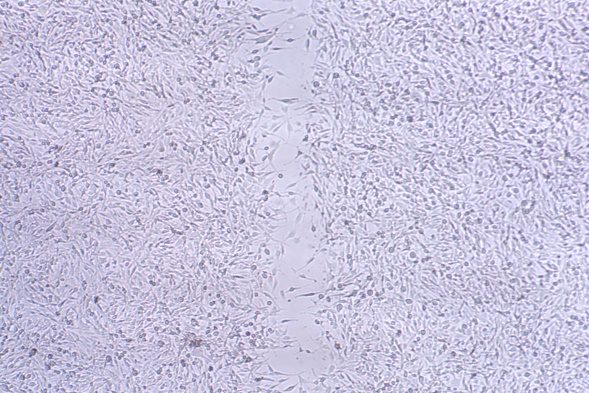


TE-1

FIGURE4







EC-109 CXCL-12 EC-109IL-6





EC-109 ACTIN







TE-1 CXCL-12 TE-1 IL-6





TE-1 ACTIN
